# Supplementary material for: The origin of grain boundary capacitance in highly doped ceria
Source: Royal Society of Chemistry journal article supplement (doi:10.1039/c5cp07032e), 2016-01-01
Supplement: c5cp07032e1.pdf [file c5cp07032e1.pdf]

## Electronic Supporting Information

### Origin of Grain Boundary Capacitance in Highly Doped Ceria

Eduardo Caetano C. Souza<sup>a</sup> and John B. Goodenough<sup>b</sup>

<sup>a</sup>Instituto de Química, Universidade de São Paulo 05508-000, SP, Brazil

<sup>b</sup>Texas Materials Institute, The University of Texas at Austin, Austin, TX 78712

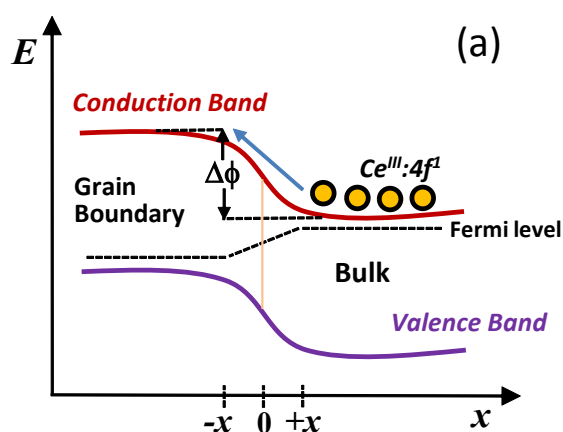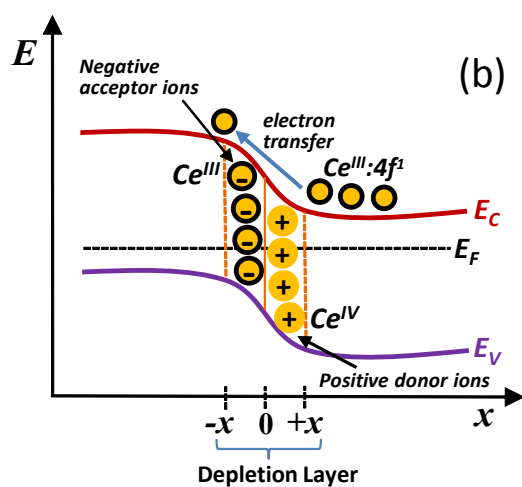

Figure S-1. Energy band diagram of bulk-grain boundary interface in a reduced doped ceria electrolyte showing the  $\text{Ce}^{\text{III}}:4f^1$  electrons firstly introduced into the grains (a) followed by charge transfer to the grain boundary phase, leading to the formation of a depletion space-charge layer at the bulk-gb junction (b).

– Instrumentation for electrical measurements

The following picture illustrates the impedance reactor constructed to perform impedance measurements under reducing atmosphere.

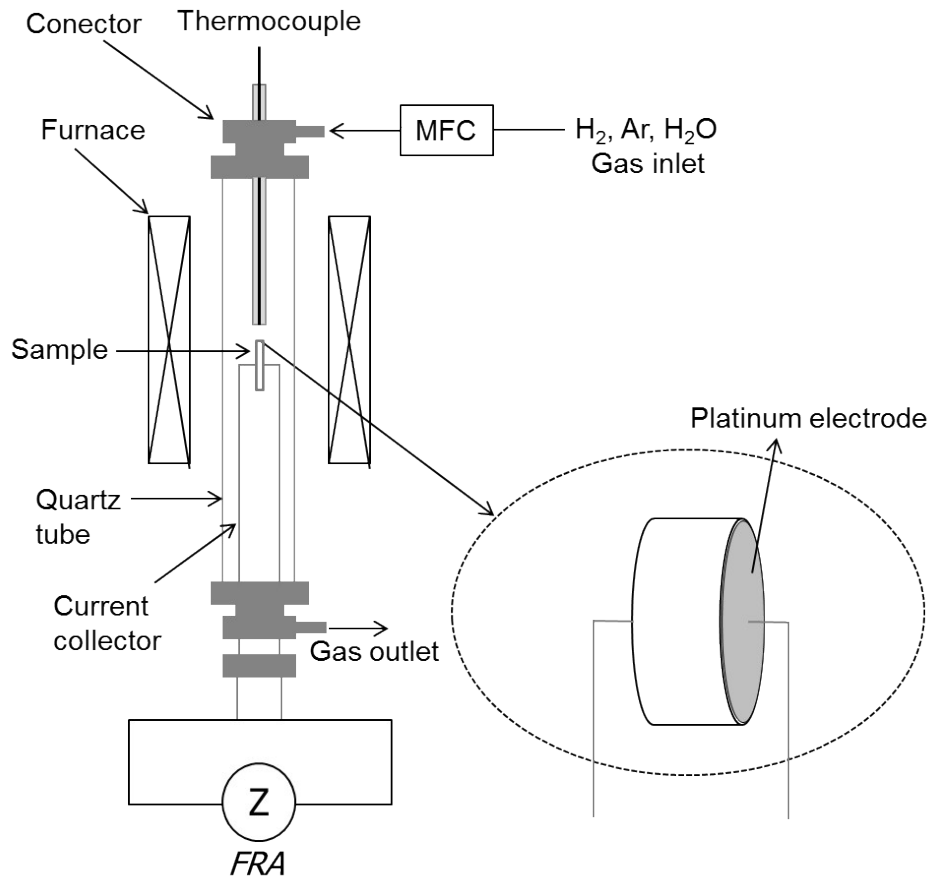

Figure S-2. Schematic of the experimental set up employed to study the electrical behavior of samarium doped ceria under different  $pO_2$  and temperature.
